# Supplementary material for: Integrated Mineral Chemistry and Monazite–Zircon U–Pb Geochronology of Wangtu Metasediments and Granites, NW Himalaya, and Their Role in Columbia Assembly
Source: Research Square preprint supplement (doi:10.21203/rs.3.rs-7897236/v1), 2025-11-13
Supplement: Supplementary file 1 [file e5eece285bb3b3fe03b03b6d.xlsx]

## Sheet: WG_16B
Table Electron probe micro analytical data and structural formulae of representative minerals in WG-16B
Mineral		Plagioclase					Biotite							Muscovite
Major oxides (wt.%)
SiO2		67.15	67.7	67.32	66.84		38.42	38.51	38.55	38.82	39			46.55	46.83	46.56
TiO2		0	0	0	0		0.95	1.05	1.04	1	0.98			0.56	0.38	0.3
Al2O3		20.63	20.11	20.42	20.32		18.51	18.41	18.64	18.89	19.01			34.31	34.21	33.98
Cr2O3		0.05	0	0.03	0.09		0.13	0.09	0	0.11	0.03			0.07	0	0
FeO		0	0.074	0	0.046		9.57	9.63	9.43	9.29	8.96			1.02	1.01	1.2
MnO		0	0	0	0		0	0.12	0.1	0.05	0.04			0	0	0.04
MgO		0	0	0	0		16.91	17.09	16.86	16.81	16.57			0.9	0.94	1.02
CaO		1.74	1.5	1.64	1.7		0	0	0	0	0			0	0	0
Na2O		10.71	10.77	10.73	10.64		0.43	0.47	0.44	0.43	0.38			1.34	1.25	1.28
K2O		0.06	0.13	0.11	0.08		9.24	9.08	9.08	8.96	9.02			9.45	9.53	9.55
Totals		100.34	100.29	100.25	99.72		94.16	94.45	94.14	94.36	93.99			94.2	94.15	93.93
Calculated mineral formulae (apfu)*
Oxygen		8					11							11
Si		2.933	2.956	2.943	2.939		2.805	2.803	2.809	2.816	2.833			3.118	3.136	3.132
Ti		0	0	0	0		0.052	0.058	0.057	0.055	0.053			0.028	0.019	0.015
Al		1.062	1.036	1.052	1.053		1.593	1.579	1.601	1.615	1.627			2.709	2.701	2.694
Cr		0.002	0	0.001	0.003		0.007	0.005	0	0.006	0.002			0.003	0	0
Fe+2		0	0	0	0		0.584	0.586	0.574	0.563	0.544			0.057	0.057	0.067
Mn		0	0	0	0		0	0.007	0.006	0.003	0.002			0	0	0.002
Mg		0	0	0	0		1.84	1.854	1.831	1.817	1.794			0.09	0.094	0.103
Ca		0.081	0.07	0.077	0.08		0	0	0	0	0			0	0	0
Na		0.907	0.912	0.909	0.907		0.061	0.066	0.063	0.06	0.053			0.174	0.163	0.167
K		0.004	0.007	0.006	0.005		0.861	0.843	0.844	0.829	0.835			0.807	0.814	0.82
Totals		4.989	4.984	4.988	4.989		7.803	7.801	7.785	7.764	7.743			6.988	6.983	7
Calculated end-member fractions (mole%)
An mole %		8.16532	7.07786	7.7621	8.06452
Ab mole %		91.4315	92.2144	91.6331	91.4315
Mg mole %							75.9076	75.9076	75.9076	75.9076	75.9076
Fe3+ estimates from stoichiometry; Mg mole%= [Mg / (Mg+Fe) X 100]; Ab mole%: [Na/(K+Na+Ca)×100];
An mole%: [Ca/(K+Na+Ca) ×100]; *Calculation is based on 8 Oxygen apfu for Plagioclase, 11 Oxygen apfu for Biotite and Muscovite ;
where apfu=atoms per formula unit
Fe+Mg		2.424	2.44	2.405	2.38
XMg		0.759076	0.759836	0.761331	0.763445
Xfe		0.240924	0.240164	0.238669	0.236555
2Ti		0.104	0.116	0.114	0.11
a		-2.3594	-2.3594	-2.3594	-2.3594
b		4.6482e-09	4.6482e-09	4.6482e-09	4.6482e-09
c		-1.7283	-1.7283	-1.7283	-1.7283
ToC		564.446	588.038	585.403	579.322
Average T =			573.26

## Sheet: Wu et al 2015
				Chemical compositions of biotite in WG 16
Source	Sample	T (ºC)	Input P (GPa)	SiO2	TiO2	Al2O3	FeO(tot)	MnO	MgO	CaO	Na2O	K2O	ZnO	Cr2O3	NiO	Sum	ratio	Si	Ti	Al	Fe	Mg	Na	K	AlVI	X(Fe)	X(Mg)	X(Ti)	ln[T(ºC)]	T (ºC)
Ghent E (1975) Temperature, pressure, and mixed-volatile equilibria attending metamorphism of staurolite-Kyanite-bearing assemblages, Esplanade Range, British Columbia. Geological Society of America Bulletin, 86: 1654-1660	CV113	516.605	1	38.42	0.95	18.51	9.57	0	16.91	0	0.43	9.24	0	0.13	0	94.16	4.38661	2.80495	0.05217	1.59269	0.5843	1.84043	0.0608671	0.860594	0.397635	0.184028	0.655715	0.0185873	6.24728	516.605
Selverstone J and Spear FS (1985) Metamorphic P-T paths from pelitic schists and greenstones from the south-west Tauern Window, Eastern Alps. Journal of Metamorphic Geology, 3: 439-465	6Ar	526.206	1	38.51	1.05	18.41	9.63	0.12	17.09	0	0.47	9.08	0	0.09	0	94.45	4.37316	2.8029	0.0574849	1.57923	0.586161	1.85432	0.0663253	0.8431	0.382132	0.184263	0.659407	0.0204419	6.26569	526.206
Gordon TM, Ghent ED and Stout MZ (1991) Algebraic analysis of the biotite-Silimanite isograde in the File Lake area, Manitoba. Canadian Mineralogist, 29: 673-686	1001	530.656	1	38.55	1.04	18.64	9.43	0.1	16.86	0	0.44	9.08	0	0	0	94.14	4.37871	2.80937	0.0570096	1.60098	0.574715	1.83169	0.0621705	0.844169	0.410357	0.180987	0.652519	0.0203091	6.27411	530.656
Tracy RJ (1978) High grade metamorphic reactions and partial melting in pelitic schist, west-central Massachusetts. American Journal of Science, 278: 150-178	871	529.626	1	38.82	1	18.89	9.29	0.05	16.81	0	0.43	8.96	0	0.11	0	94.36	4.35757	2.8154	0.0545523	1.61463	0.56345	1.81744	0.0604643	0.828992	0.430021	0.177883	0.649062	0.0194823	6.27217	529.626
Chacko T, Ravindra Kumar GR and Newton RC (1987) Metamorphic P–T conditions of the Kerala (South India) khondalite belt, a granulite facies supracrustal terrain. Journal of Geology, 95: 343–358	84	534.632	1	39	0.98	19.01	8.96	0.04	16.57	0	0.38	9.02	0	0.03	0	93.99	4.36348	2.83228	0.0535337	1.62708	0.544172	1.79392	0.0535059	0.835674	0.459367	0.17255	0.643474	0.0192024	6.28158	534.632
Hauzenberger CA, Mogessie A, Hoinkes G, Felfernig A, Bjerg EA, Kostadinoff J, Delpino S and Dimieri L (2001) Metamorphic evolution of the Sierras de San Luis, Argentina: granulite facies metamorphism related to mafic intrusions. Mineralogy and Petrology, 71: 95-126	LA5
Neogi S, Dasgupta S and Fukuoka M (1998) High P-T polymetamorphism, dehydration melting, and generation of migmatites and granites in the Higher Himalayan Crystalline Complex, Sikkim, India. Journal of Petrology, 39: 61-99	113-88
Vrána S, Štědrá V and Fišera M (2005) Petrology and geochemistry of the Běstvina granulite body metamorphosed at eclogite facies conditions, Bohemian Massif. Journal of the Czech Geological Society, 50: 95–106	MF159	Input P (GPa)	T (ºC)			P(Gpa)	T(°C)
Regis D, Warren CJ, Young D and Roberts NMW (2014) Tectono-metamorphic evolution of the Jomolhari massif: Variations in timing of syn-collisional metamorphism across western Bhutan. Lithos, 190–191: 449–466	Drb1230	1	516.605	Avg=528ºC		1.2	532.338	Avg=532ºC
Hallett BW and Spear FS (2014) The P–T history of anatectic pelites of the northern east Humboldt Range, Nevada: evidence for tectonic loading, decompression, and anatexis Journal of Petrology, 55: 3–36	EH21	1	526.206			1.2	542.232
		1	530.656			1.2	546.817
		1	529.626			1.2	545.756
		1	534.632			1.2	550.914
		Std.Dev	6.0945			Std.Dev	6.28011

## Sheet: WG_11B
Table Electron probe micro analytical data and structural formulae of representative minerals in WG-11B
Mineral		Muscovite																				Chlorite				Ilmenite
Major oxides (wt.%)
SiO2		45.85	45.12	46.31	45.9	45.89	46.85	46.54	46.36	46.79	47.58	47.33	47.21	46.17	47.21	45.88	46.42	47	47.36	47.07		23.87	24.21	23.96		0.013	0.034
TiO2		0.35	0.25	0.2	0.12	0.17	0.3	0.35	0.26	0.15	0.26	0.24	0.26	0.26	0.18	0.15	0.04	0.26	0.29	0.22		0.14	0.11	0.12		18.155	29.074
Al2O3		33.55	32.99	33.96	33.7	33.18	34.33	33.5	33.64	33.19	34.55	34.25	34.57	33.63	33.93	33.63	34.25	33.63	33.9	33.61		21.87	22.42	21.35		0.135	0.141
Cr2O3		0.1	0.05	0	0	0.07	0.03	0.01	0.13	0.07	0	0	0.04	0.01	0.06	0.04	0	0	0	0.07		0	0.05	0.01		0.099	0
FeO		2.23	1.87	2.3	2.51	2.15	2.21	2.03	2.23	2.19	1.97	2.4	2.26	2.09	2.37	2.46	2.16	2.44	2.19	2.33		27.67	26.8	32.96		73.276	65.275
MnO		0.01	0	0	0	0.04	0.02	0.06	0	0.04	0.06	0	0	0	0	0.01	0	0	0	0.06		0	0	0.02		0	0.218
MgO		0.36	0.38	0.4	0.39	0.46	0.42	0.49	0.38	0.47	0.38	0.47	0.42	0.43	0.53	0.34	0.35	0.48	0.46	0.52		12.17	13.26	8.81		0.035	0.051
CaO		0	0	0	0	0	0.01	0	0	0	0	0	0.05	0	0	0	0.01	0	0	0		0.01	0	0.03		0	0.01
Na2O		1.34	1.38	1.34	1.39	1.3	1.3	1.28	1.37	1.31	1.39	1.32	1.48	1.34	1.37	1.26	1.35	1.3	1.33	1.35		0	0.03	0.03		0.028	0
K2O		9.27	9.2	9.44	9.15	9.36	9.27	9.45	9.2	9.27	9.22	9.11	9.39	9.37	9.31	9.2	9.31	9.28	9.4	9.45		0.02	0.02	0.05		0.015	0.026
Totals		93.06	91.24	93.95	93.16	92.62	94.74	93.71	93.57	93.48	95.41	95.12	95.68	93.3	94.96	92.97	93.89	94.39	94.93	94.68		85.75	86.9	87.34		91.76	94.83
Calculated mineral formulae (apfu)*
Oxygen		11																				23				11
Si		3.127	3.134	3.129	3.128	2.173	2.181	2.184	2.179	2.199	2.2	2.196	2.185	2.174	2.196	2.167	2.175	2.195	2.202	2.195		1.674	1.676	1.69		0	0.001
Ti		0.018	0.013	0.01	0.006	0.006	0.01	0.012	0.009	0.005	0.009	0.008	0.009	0.009	0.006	0.005	0.001	0.009	0.01	0.008		0.008	0.006	0.006		0.363	0.384
Al		2.698	2.702	2.705	2.707	1.853	1.884	1.854	1.864	1.839	1.884	1.873	1.886	1.867	1.86	1.873	1.892	1.852	1.858	1.848		1.808	1.83	1.776		0.004	0.003
Cr		0.006	0.003	0	0	0.003	0.001	0.001	0.005	0.002	0	0	0.001	0.001	0.002	0.002	0	0	0	0.003		0	0.003	0.001		0.002	0
Fe+2		0.127	0.109	0.13	0.143	0.085	0.086	0.08	0.087	0.086	0.076	0.093	0.087	0.083	0.092	0.097	0.085	0.095	0.085	0.091		1.623	1.552	1.945		0.358	0.96
Mn		0	0	0	0	0.001	0.001	0.003	0	0.001	0.002	0	0	0	0	0	0	0	0	0.002		0	0	0.001		0	0.003
Mg		0.037	0.04	0.04	0.039	0.032	0.029	0.034	0.026	0.033	0.026	0.032	0.029	0.03	0.037	0.024	0.025	0.034	0.032	0.036		1.272	1.368	0.927		0.001	0.001
Ca		0	0	0	0	0	0	0	0	0	0	0	0.003	0	0	0	0.001	0	0	0		0.001	0	0.002		0	0
Na		0.177	0.185	0.176	0.183	0.12	0.118	0.117	0.125	0.119	0.124	0.118	0.133	0.123	0.123	0.115	0.123	0.118	0.119	0.122		0	0.003	0.005		0.001	0
K		0.806	0.815	0.814	0.795	0.565	0.55	0.566	0.552	0.556	0.544	0.539	0.554	0.563	0.552	0.554	0.557	0.553	0.558	0.562		0.002	0.002	0.005		0.001	0.001
Totals		6.996	7.001	7.004	7.002	7.104	7.087	7.096	7.093	7.089	7.078	7.079	7.1	7.1	7.093	7.097	7.098	7.089	7.087	7.099		9.739	9.75	9.733		2	2.194
where apfu*=atoms per formula unit
