# Supplementary material for: Integrated Mineral Chemistry and Monazite–Zircon U–Pb Geochronology of Wangtu Metasediments and Granites, NW Himalaya, and Their Role in Columbia Assembly
Source: Research Square preprint supplement (doi:10.21203/rs.3.rs-7897236/v1), 2025-11-13
Supplement: Supplementary file 1 [file fafd65b030af747173f62902.pdf]

## Supplementary Figures

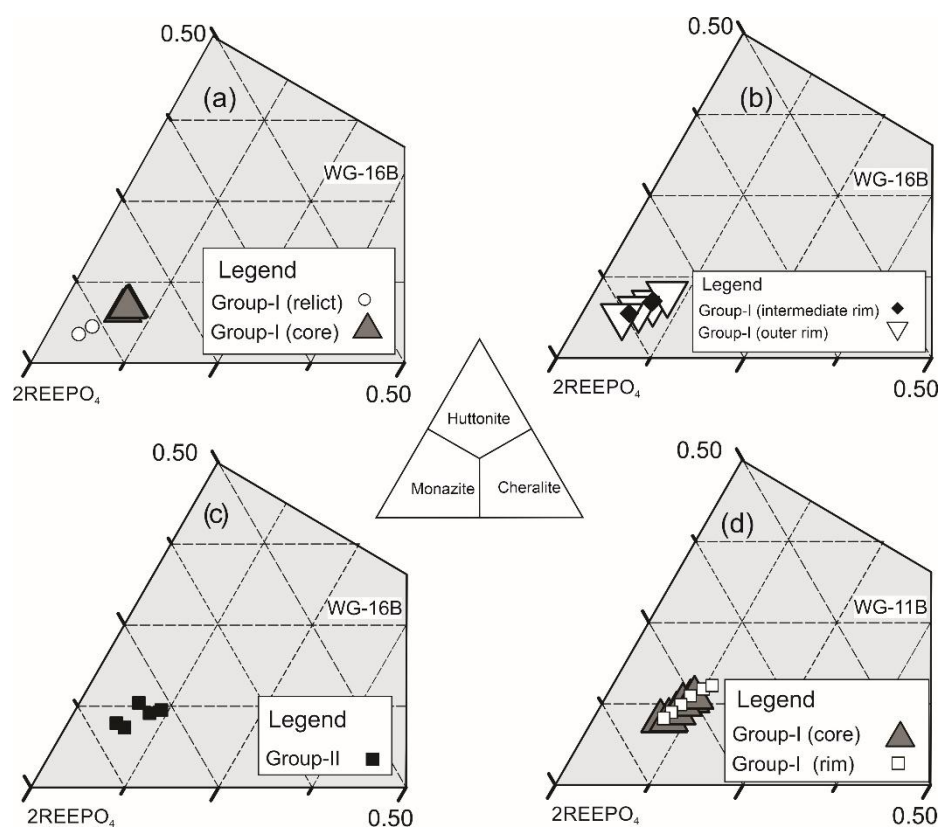

**Supplementary figure 1 a-d** Plot after (Linthout 2007) showing compositional variation among Monazite grains from the studied samples WG 16B and WG 11B.

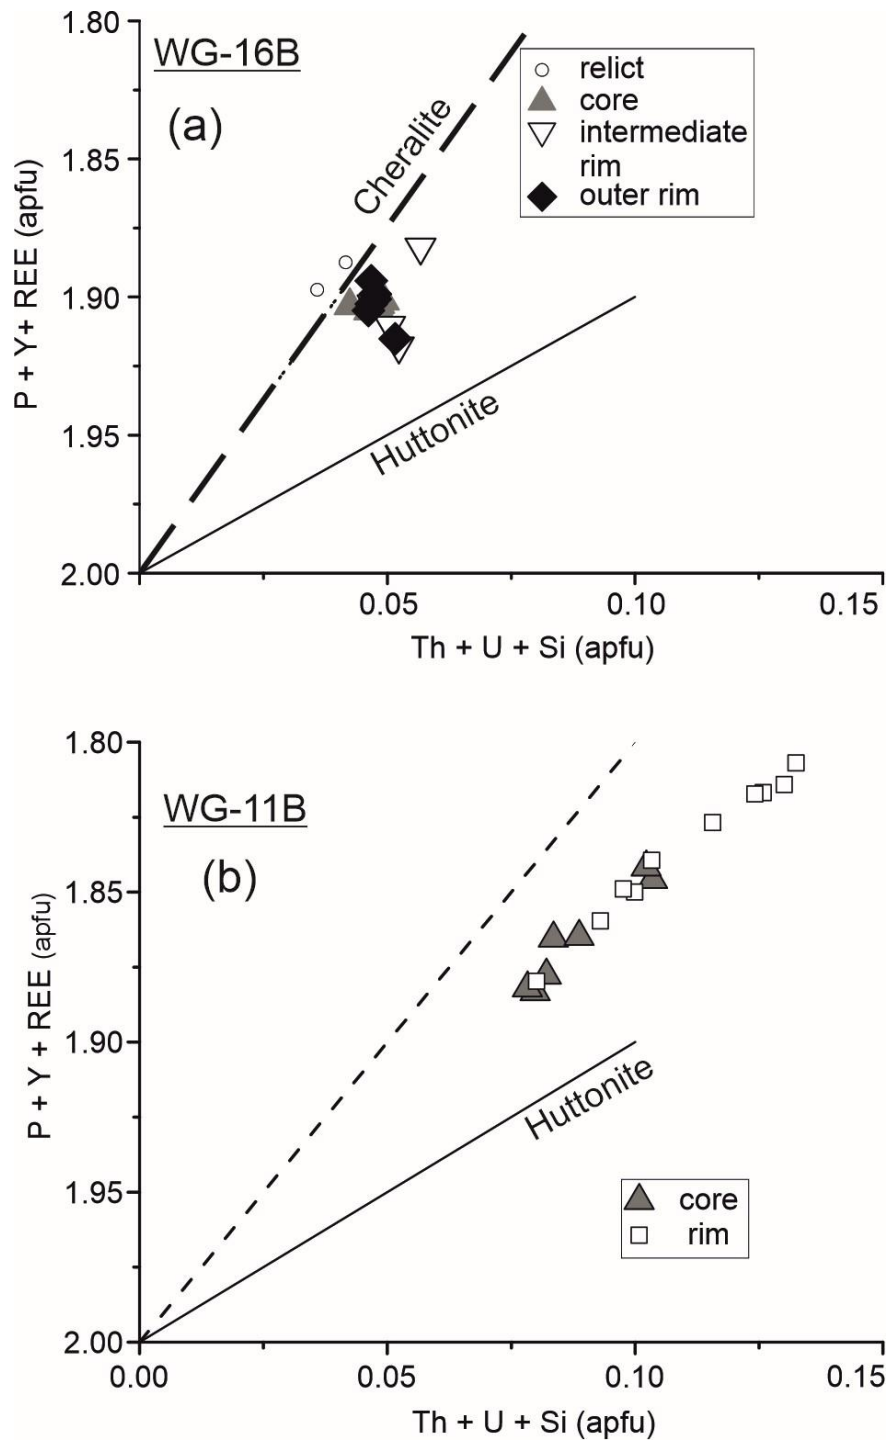

**Supplementary figure 2 a, b** P + Y + REE (apfu) versus Th + U + Si (apfu) plot for both the WG-16B and WG-11B samples.

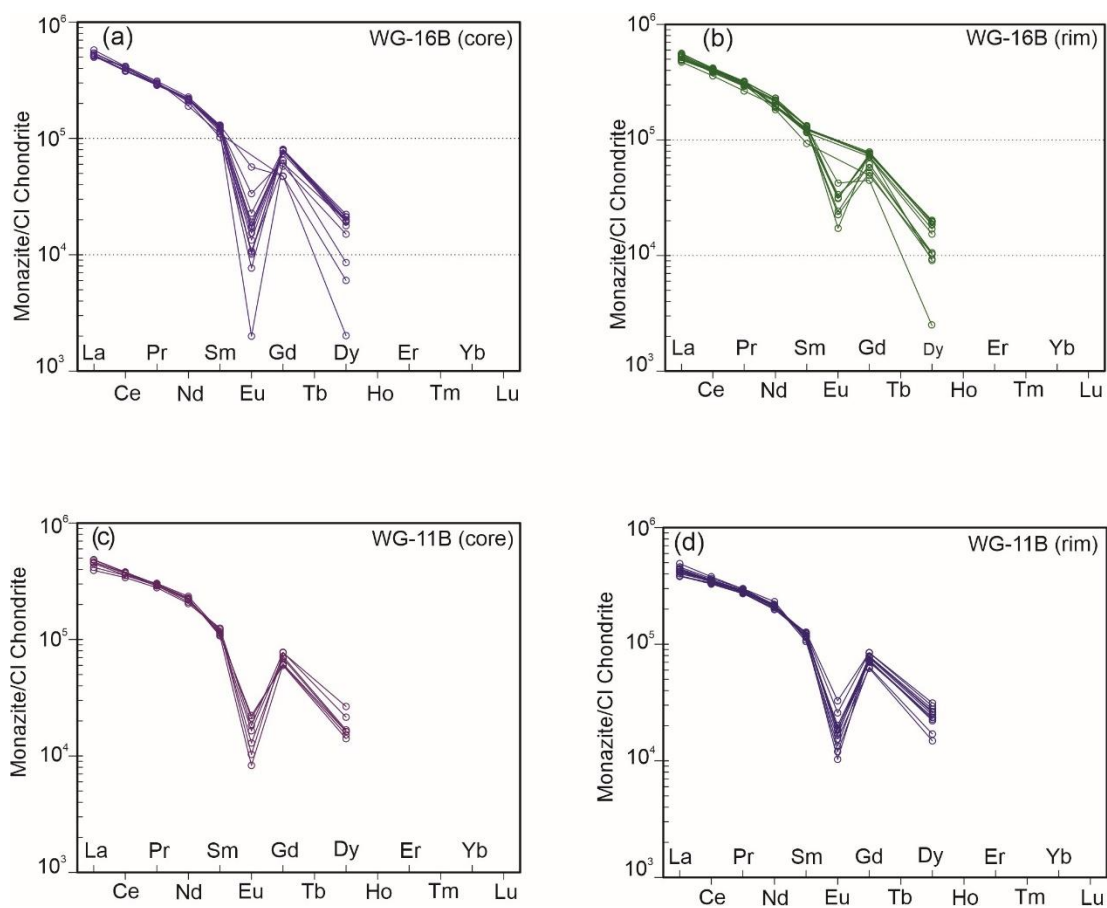

**Supplementary figure 3 a-d** CI chondrite normalized spider plot for monazite grains from the studied samples.
